# Supplementary material for: A first generation whole genome RH map of the river buffalo with comparison to domestic cattle
Source: PubMed Central journal article supplement (PMC2625372; doi:10.1186/1471-2164-9-631), 2008-12-24
Supplement: 1471-2164-9-631-S3.pdf [file 1471-2164-9-631-S3.pdf]

amaraUIDs.txt

9691634 2651 1 ADAM2 \*  
 9691635 2651 1 ADAMTS1 \*  
 9691636 2651 1 AHSG \*  
 9691637 2651 1 AW267109 \*  
 9691638 2651 1 BBX \*  
 9691639 2651 1 BM1312 \*  
 9691640 2651 1 BM1856 \*  
 9691641 2651 1 BM6438 \*  
 9691642 2651 1 BM6506 \*  
 9691643 2651 1 BM6526 \*  
 9691644 2651 1 BMS2263 \*  
 9691645 2651 1 BMS4030 \*  
 9691646 2651 1 BMS527 \*  
 9691647 2651 1 BRF2 \*  
 9691648 2651 1 C21orf45 \*  
 9691649 2651 1 C8orf42 \*  
 9691650 2651 1 C8orf79 \*  
 9691651 2651 1 CARF \*  
 9691652 2651 1 CASR \*  
 9691653 2651 1 CLN8 \*  
 9691654 2651 1 CNOT7 \*  
 9691655 2651 1 CRYAA \*  
 9691656 2651 1 CSSM019 \*  
 9691657 2651 1 DCTN6 \*  
 9691658 2651 1 DEFB1 \*  
 9691659 2651 1 DLGAP2 \*  
 9691660 2651 1 DOC1 \*  
 9691661 2651 1 FOXL2 \*  
 9691662 2651 1 HLCS \*  
 9691663 2651 1 HOOK3 \*  
 9691664 2651 1 IFNAR1 \*  
 9691665 2651 1 IFNGR2 \*  
 9691666 2651 1 IL12A \*  
 9691667 2651 1 LOC151584 \*  
 9691668 2651 1 MX1 \*  
 9691669 2651 1 NCK1 \*  
 9691670 2651 1 NRG1 \*  
 9691671 2651 1 ODZ3 \*  
 9691672 2651 1 PDIR \*  
 9691673 2651 1 PLAT \*  
 9691674 2651 1 POU1F1 \*  
 9691675 2651 1 PPP1R2 \*  
 9691676 2651 1 PROS1 \*  
 9691677 2651 1 PRSS7 \*  
 9691678 2651 1 RM095 \*  
 9691679 2651 1 RM209 \*  
 9691680 2651 1 RNF7 \*  
 9691681 2651 1 ROBO2 \*  
 9691682 2651 1 SH2D4A \*  
 9691683 2651 1 SLC25A4 \*  
 9691684 2651 1 SOD1 \*  
 9691685 2651 1 SR140 \*  
 9691686 2651 1 STCH5 \*  
 9691687 2651 1 TACTILE \*  
 9691688 2651 1 TGLA179 \*  
 9691689 2651 1 TGLA57 \*  
 9691690 2651 1 THAP1 \*  
 9691691 2651 1 TLOC1 \*  
 9691692 2651 1 TRAD \*  
 9691693 2651 1 WRN \*  
 9691694 2651 1 ALCAM \*  
 9691695 2651 1 APOD \*  
 9691696 2651 1 ESDN \*  
 9691697 2651 1 INRA134 \*  
 9691698 2651 1 KRTAP8 \*  
 9691699 2651 1 TGLA49 \*

amaralUIDs.txt

9691700 2651 1 ACTR3 \*  
 9691701 2651 1 ARHGEF4 \*  
 9691702 2651 1 BM3627 \*  
 9691703 2651 1 BMS4036 \*  
 9691704 2651 1 BOLA-DMA \*  
 9691705 2651 1 BOLA-DNA \*  
 9691706 2651 1 BOLA-DQA2 \*  
 9691707 2651 1 BOLA-DRA \*  
 9691708 2651 1 BOLA-DRB \*  
 9691709 2651 1 BOLA-DRB2 \*  
 9691710 2651 1 BOLA-DRB3 \*  
 9691711 2651 1 BY11 \*  
 9691712 2651 1 BZ921457 \*  
 9691713 2651 1 BZ953683 \*  
 9691714 2651 1 C6ORF136 \*  
 9691715 2651 1 CASP8 \*  
 9691716 2651 1 CCND3 \*  
 9691717 2651 1 CD28 \*  
 9691718 2651 1 CLIC1 \*  
 9691719 2651 1 COL3A1-95 \*  
 9691720 2651 1 CXCR4 \*  
 9691721 2651 1 DOM3Z \*  
 9691722 2651 1 FBXO9 \*  
 9691723 2651 1 GCLC \*  
 9691724 2651 1 GDF8 \*  
 9691725 2651 1 GORASP2 \*  
 9691726 2651 1 GRB14 \*  
 9691727 2651 1 GSTA2 \*  
 9691728 2651 1 GUCA1A \*  
 9691729 2651 1 HLA-DMB \*  
 9691730 2651 1 HRB \*  
 9691731 2651 1 INHA \*  
 9691732 2651 1 ITPR3 \*  
 9691733 2651 1 LOC510454 \*  
 9691734 2651 1 MARC\_21447-21448 \*  
 9691735 2651 1 MARC\_21564-21565 \*  
 9691736 2651 1 MARC\_4031-4032 \*  
 9691737 2651 1 MARC\_5369-5370 \*  
 9691738 2651 1 MUT \*  
 9691739 2651 1 NXPH2 \*  
 9691740 2651 1 PEX6 \*  
 9691741 2651 1 POLR1C \*  
 9691742 2651 1 PRL \*  
 9691743 2651 1 PTP4A2 \*  
 9691744 2651 1 RH18135 \*  
 9691745 2651 1 SCG2 \*  
 9691746 2651 1 SHGC-31988 \*  
 9691747 2651 1 SKIV2L \*  
 9691748 2651 1 SLC11A1 \*  
 9691749 2651 1 SMARCAL \*  
 9691750 2651 1 STAM2 \*  
 9691751 2651 1 STAT1 \*  
 9691752 2651 1 TAPBP \*  
 9691753 2651 1 TEXAN-2 \*  
 9691754 2651 1 TGLA44 \*  
 9691755 2651 1 TNRC5 \*  
 9691756 2651 1 TTN-1 \*  
 9691757 2651 1 WASF2 \*  
 9691758 2651 1 WRNIP1 \*  
 9691759 2651 1 GCG \*  
 9691760 2651 1 MTCH1 \*  
 9691761 2651 1 TGLA377 \*  
 9691762 2651 1 ACVR1 \*  
 9691763 2651 1 ALPL \*  
 9691764 2651 1 BMON115 \*  
 9691765 2651 1 BOLA-DQA \*

amaralUIDs.txt

|         |      |   |                |   |
|---------|------|---|----------------|---|
| 9691766 | 2651 | 1 | BoLA-DYA       | * |
| 9691767 | 2651 | 1 | BoLA-DYB       | * |
| 9691768 | 2651 | 1 | CFLAR          | * |
| 9691769 | 2651 | 1 | D2S1630E       | * |
| 9691770 | 2651 | 1 | FLJ3277        | * |
| 9691771 | 2651 | 1 | NUDC           | * |
| 9691772 | 2651 | 1 | PSMB9          | * |
| 9691773 | 2651 | 1 | ACADVL         | * |
| 9691774 | 2651 | 1 | ATP6V1G1       | * |
| 9691775 | 2651 | 1 | BLK            | * |
| 9691776 | 2651 | 1 | CHIRUC2        | * |
| 9691777 | 2651 | 1 | CNP            | * |
| 9691778 | 2651 | 1 | CYLC2          | * |
| 9691779 | 2651 | 1 | FDFT1          | * |
| 9691780 | 2651 | 1 | G73127         | * |
| 9691781 | 2651 | 1 | GSN            | * |
| 9691782 | 2651 | 1 | LPL            | * |
| 9691783 | 2651 | 1 | LZTS1          | * |
| 9691784 | 2651 | 1 | MARC_5939-5940 | * |
| 9691785 | 2651 | 1 | MARC_7851-7852 | * |
| 9691786 | 2651 | 1 | MYH1           | * |
| 9691787 | 2651 | 1 | P4HB           | * |
| 9691788 | 2651 | 1 | TEK            | * |
| 9691789 | 2651 | 1 | TYRP1          | * |
| 9691790 | 2651 | 1 | VLDLR          | * |
| 9691791 | 2651 | 1 | XKR6           | * |
| 9691792 | 2651 | 1 | BE096286       | * |
| 9691793 | 2651 | 1 | COL1A1         | * |
| 9691794 | 2651 | 1 | CSAP16E        | * |
| 9691795 | 2651 | 1 | PMC201071P3    | * |
| 9691796 | 2651 | 1 | RH44484        | * |
| 9691797 | 2651 | 1 | SRCRS10        | * |
| 9691798 | 2651 | 1 | TPJ2           | * |
| 9691799 | 2651 | 1 | ANK3           | * |
| 9691800 | 2651 | 1 | ANXA11         | * |
| 9691801 | 2651 | 1 | ANXA8          | * |
| 9691802 | 2651 | 1 | AW464595       | * |
| 9691803 | 2651 | 1 | BL25           | * |
| 9691804 | 2651 | 1 | BM2515         | * |
| 9691805 | 2651 | 1 | BMC1002        | * |
| 9691806 | 2651 | 1 | BMC6020        | * |
| 9691807 | 2651 | 1 | BMS1714        | * |
| 9691808 | 2651 | 1 | BMS2079        | * |
| 9691809 | 2651 | 1 | BMS2658        | * |
| 9691810 | 2651 | 1 | BMS362         | * |
| 9691811 | 2651 | 1 | BP23           | * |
| 9691812 | 2651 | 1 | BZ900694       | * |
| 9691813 | 2651 | 1 | CC472414       | * |
| 9691814 | 2651 | 1 | CC504182       | * |
| 9691815 | 2651 | 1 | CC517126       | * |
| 9691816 | 2651 | 1 | CC537389       | * |
| 9691817 | 2651 | 1 | CHS1           | * |
| 9691818 | 2651 | 1 | ETH1112        | * |
| 9691819 | 2651 | 1 | IDVGA-43       | * |
| 9691820 | 2651 | 1 | ILSTS060       | * |
| 9691821 | 2651 | 1 | PPYR1          | * |
| 9691822 | 2651 | 1 | RBP3           | * |
| 9691823 | 2651 | 1 | TACR2          | * |
| 9691824 | 2651 | 1 | ZNF33A         | * |
| 9691825 | 2651 | 1 | BMS697         | * |
| 9691826 | 2651 | 1 | HK1            | * |
| 9691827 | 2651 | 1 | AW267148       | * |
| 9691828 | 2651 | 1 | AW289394       | * |
| 9691829 | 2651 | 1 | AW461592       | * |
| 9691830 | 2651 | 1 | AW482289       | * |
| 9691831 | 2651 | 1 | BM121          | * |

amaralUIDs.txt

9691832 2651 1 BM1706 \*  
 9691833 2651 1 BMC3224 \*  
 9691834 2651 1 BMC6004 \*  
 9691835 2651 1 BMC8012 \*  
 9691836 2651 1 BMS357 \*  
 9691837 2651 1 BMS462 \*  
 9691838 2651 1 BZ900418 \*  
 9691839 2651 1 BZ901563 \*  
 9691840 2651 1 BZ905352 \*  
 9691841 2651 1 BZ910068 \*  
 9691842 2651 1 BZ930457 \*  
 9691843 2651 1 BZ932751 \*  
 9691844 2651 1 BZ933262 \*  
 9691845 2651 1 BZ938148 \*  
 9691846 2651 1 BZ944687 \*  
 9691847 2651 1 BZ946384 \*  
 9691848 2651 1 BZ948508 \*  
 9691849 2651 1 BZ950494 \*  
 9691850 2651 1 BZ951039 \*  
 9691851 2651 1 BZ951725 \*  
 9691852 2651 1 BZ952478 \*  
 9691853 2651 1 CC447793 \*  
 9691854 2651 1 CSSM003 \*  
 9691855 2651 1 HUJ614 \*  
 9691856 2651 1 IDVGA-26 \*  
 9691857 2651 1 ILSTS019 \*  
 9691858 2651 1 ILSTS057 \*  
 9691859 2651 1 ILSTS081 \*  
 9691860 2651 1 ILSTS089 \*  
 9691861 2651 1 RM040 \*  
 9691862 2651 1 BZ919428 \*  
 9691863 2651 1 BZ919809 \*  
 9691864 2651 1 BZ945895 \*  
 9691865 2651 1 AW289372 \*  
 9691866 2651 1 AW461519 \*  
 9691867 2651 1 BMS1600 \*  
 9691868 2651 1 CC562100 \*  
 9691869 2651 1 INRA048 \*  
 9691870 2651 1 RME33 \*  
 9691871 2651 1 S68957 \*  
 9691872 2651 1 ACF7 \*  
 9691873 2651 1 AW267062 \*  
 9691874 2651 1 BE217553 \*  
 9691875 2651 1 BL41 \*  
 9691876 2651 1 BMS1636 \*  
 9691877 2651 1 BMS2075 \*  
 9691878 2651 1 BMS835 \*  
 9691879 2651 1 BMS963 \*  
 9691880 2651 1 CRABP2 \*  
 9691881 2651 1 CSF1 \*  
 9691882 2651 1 CSSM054 \*  
 9691883 2651 1 CYP2J2 \*  
 9691884 2651 1 HSD3B \*  
 9691885 2651 1 IDVGA-27 \*  
 9691886 2651 1 IDVGA-53 \*  
 9691887 2651 1 INRA041 \*  
 9691888 2651 1 JUN \*  
 9691889 2651 1 MB099 \*  
 9691890 2651 1 MUF1 \*  
 9691891 2651 1 NCDN \*  
 9691892 2651 1 NEDD5 \*  
 9691893 2651 1 NGFB \*  
 9691894 2651 1 NRAS \*  
 9691895 2651 1 OVGPI \*  
 9691896 2651 1 PGM1 \*  
 9691897 2651 1 PTGFR \*

amaraUIDs.txt

|         |      |              |   |
|---------|------|--------------|---|
| 9691898 | 2651 | 1 SAG        | * |
| 9691899 | 2651 | 1 TUFT1      | * |
| 9691900 | 2651 | 1 UOX        | * |
| 9691901 | 2651 | 1 UWCA7      | * |
| 9691902 | 2651 | 1 VAV3       | * |
| 9691903 | 2651 | 1 DPYD       | * |
| 9691904 | 2651 | 1 EDG1       | * |
| 9691905 | 2651 | 1 MB101      | * |
| 9691906 | 2651 | 1 RM019      | * |
| 9691907 | 2651 | 1 ABCG2      | * |
| 9691908 | 2651 | 1 ACOX3      | * |
| 9691909 | 2651 | 1 AGXT2L1    | * |
| 9691910 | 2651 | 1 ATP8A1     | * |
| 9691911 | 2651 | 1 BM1236     | * |
| 9691912 | 2651 | 1 BM415      | * |
| 9691913 | 2651 | 1 BM4621     | * |
| 9691914 | 2651 | 1 BMS382     | * |
| 9691915 | 2651 | 1 CCKAR      | * |
| 9691916 | 2651 | 1 CENPC1     | * |
| 9691917 | 2651 | 1 CENTD1     | * |
| 9691918 | 2651 | 1 CHIC2      | * |
| 9691919 | 2651 | 1 CNOT6L     | * |
| 9691920 | 2651 | 1 CSN10      | * |
| 9691921 | 2651 | 1 CSN3       | * |
| 9691922 | 2651 | 1 DIK5359    | * |
| 9691923 | 2651 | 1 DIK5407    | * |
| 9691924 | 2651 | 1 DMP1       | * |
| 9691925 | 2651 | 1 EPHA5      | * |
| 9691926 | 2651 | 1 FBN12      | * |
| 9691927 | 2651 | 1 FBN14      | * |
| 9691928 | 2651 | 1 FBN21      | * |
| 9691929 | 2651 | 1 GABRA2     | * |
| 9691930 | 2651 | 1 GBA3       | * |
| 9691931 | 2651 | 1 GPR103     | * |
| 9691932 | 2651 | 1 HBXIP      | * |
| 9691933 | 2651 | 1 HNRPDL     | * |
| 9691934 | 2651 | 1 IBSP       | * |
| 9691935 | 2651 | 1 IGFBP7     | * |
| 9691936 | 2651 | 1 KDR        | * |
| 9691937 | 2651 | 1 KIAA0746   | * |
| 9691938 | 2651 | 1 KLHL8      | * |
| 9691939 | 2651 | 1 LAP3       | * |
| 9691940 | 2651 | 1 LDB2       | * |
| 9691941 | 2651 | 1 LPHN3      | * |
| 9691942 | 2651 | 1 LRPAP1     | * |
| 9691943 | 2651 | 1 MAD2L1     | * |
| 9691944 | 2651 | 1 MAPK10     | * |
| 9691945 | 2651 | 1 MTPP       | * |
| 9691946 | 2651 | 1 NCAPG      | * |
| 9691947 | 2651 | 1 NDST4      | * |
| 9691948 | 2651 | 1 NEUROG2    | * |
| 9691949 | 2651 | 1 PHOX2B     | * |
| 9691950 | 2651 | 1 PI4K2B     | * |
| 9691951 | 2651 | 1 PPAT       | * |
| 9691952 | 2651 | 1 PPP3CA     | * |
| 9691953 | 2651 | 1 PTPN13-LGC | * |
| 9691954 | 2651 | 1 QDPR       | * |
| 9691955 | 2651 | 1 SCARB2     | * |
| 9691956 | 2651 | 1 SLIT2      | * |
| 9691957 | 2651 | 1 SMARCAD1   | * |
| 9691958 | 2651 | 1 SPP1       | * |
| 9691959 | 2651 | 1 TKTL2      | * |
| 9691960 | 2651 | 1 TLR10      | * |
| 9691961 | 2651 | 1 TLR6       | * |
| 9691962 | 2651 | 1 TRAM1L1    | * |
| 9691963 | 2651 | 1 UBE2D3     | * |

amaralUIDs.txt

9691964 2651 1 UGDH \*  
 9691965 2651 1 UGT8 \*  
 9691966 2651 1 UNC5C \*  
 9691967 2651 1 GK2 \*  
 9691968 2651 1 BM1329 \*  
 9691969 2651 1 BM143 \*  
 9691970 2651 1 BMC4203 \*  
 9691971 2651 1 CXCL1 \*  
 9691972 2651 1 FBN13 \*  
 9691973 2651 1 NUP54 \*  
 9691974 2651 1 OARHH55 \*  
 9691975 2651 1 PPARGC1A \*  
 9691976 2651 1 SNCA \*  
 9691977 2651 1 SOD3 \*  
 9691978 2651 1 TEC \*  
 9691979 2651 1 TLR1 \*  
 9691980 2651 1 CSSM014 \*  
 9691981 2651 1 INHBA \*  
 9691982 2651 1 CCNH \*  
 9691983 2651 1 COMP \*  
 9691984 2651 1 CRTL1 \*  
 9691985 2651 1 D7S3 \*  
 9691986 2651 1 GUK1 \*  
 9691987 2651 1 ICAM3 \*  
 9691988 2651 1 IL12B \*  
 9691989 2651 1 IL4 \*  
 9691990 2651 1 MEF2C \*  
 9691991 2651 1 RASA1 \*  
 9691992 2651 1 RFXANK \*  
 9691993 2651 1 IRF1 \*  
 9691994 2651 1 BM4208 \*  
 9691995 2651 1 BMS1148 \*  
 9691996 2651 1 BMS1234 \*  
 9691997 2651 1 BMS1290 \*  
 9691998 2651 1 BMS1724 \*  
 9691999 2651 1 BMS1909 \*  
 9692000 2651 1 BMS817 \*  
 9692001 2651 1 CGA \*  
 9692002 2651 1 COL12A1 \*  
 9692003 2651 1 ETH225\_(MB009) \*  
 9692004 2651 1 IGF2R \*  
 9692005 2651 1 ILSTS076 \*  
 9692006 2651 1 MLLT4 \*  
 9692007 2651 1 MYB \*  
 9692008 2651 1 PLG \*  
 9692009 2651 1 PLN \*  
 9692010 2651 1 SOD2\_(5) \*  
 9692011 2651 1 TGLA73 \*  
 9692012 2651 1 VIL2 \*  
 9692013 2651 1 PPP6C \*  
 9692014 2651 1 BMS2377 \*  
 9692015 2651 1 BMS555 \*  
 9692016 2651 1 CTGF \*  
 9692017 2651 1 REN49736 \*  
 9692018 2651 1 ADAM29 \*  
 9692019 2651 1 AW466107 \*  
 9692020 2651 1 AW659200 \*  
 9692021 2651 1 BE589327 \*  
 9692022 2651 1 BF774993 \*  
 9692023 2651 1 BP230005B10F10 \*  
 9692024 2651 1 BP230006B20H5 \*  
 9692025 2651 1 BP230010A10C2 \*  
 9692026 2651 1 BP230010B20B9 \*  
 9692027 2651 1 BP230011A10A9 \*  
 9692028 2651 1 BP230012B20F8 \*  
 9692029 2651 1 BP230020B10D12 \*

amaralUIDs.txt

9692030 2651 1 BP230021A10E3 \*  
 9692031 2651 1 BP230035000B6 \*  
 9692032 2651 1 BP230036000E3 \*  
 9692033 2651 1 BP240034A10G4 \*  
 9692034 2651 1 BP250002A20F1 \*  
 9692035 2651 1 BP250002B20G8 \*  
 9692036 2651 1 BP250005B10A4 \*  
 9692037 2651 1 BP250007B20D4 \*  
 9692038 2651 1 BP250008A10D12 \*  
 9692039 2651 1 BP250012A20G8 \*  
 9692040 2651 1 BP250014B10G12 \*  
 9692041 2651 1 BP250015A10A10 \*  
 9692042 2651 1 BP250015A10G9 \*  
 9692043 2651 1 BP250015A10H10 \*  
 9692044 2651 1 BP250015B10E9 \*  
 9692045 2651 1 BP250015B20B2 \*  
 9692046 2651 1 BP250022A10A10 \*  
 9692047 2651 1 BP250022B20B1 \*  
 9692048 2651 1 btcn11585 \*  
 9692049 2651 1 btcn20443 \*  
 9692050 2651 1 btcn21374 \*  
 9692051 2651 1 btcn22649 \*  
 9692052 2651 1 Btcn24223 \*  
 9692053 2651 1 btcn24758 \*  
 9692054 2651 1 btcn26458 \*  
 9692055 2651 1 btcn28117 \*  
 9692056 2651 1 btcn28333 \*  
 9692057 2651 1 btcn34158 \*  
 9692058 2651 1 btcn36177 \*  
 9692059 2651 1 btcn39699 \*  
 9692060 2651 1 btcn41123 \*  
 9692061 2651 1 btcn4374 \*  
 9692062 2651 1 btcn45788 \*  
 9692063 2651 1 btcn47368 \*  
 9692064 2651 1 CSRM60 \*  
 9692065 2651 1 Btcn35777 \*  
 9692066 2651 1 CYP19A1\_(CYP19B) \*  
 9692067 2651 1 BTBD6 \*  
 9692068 2651 1 EIF5 \*  
 9692069 2651 1 IGHA1 \*  
 9692070 2651 1 KNS2 \*  
 9692071 2651 1 LGB \*  
 9692072 2651 1 SNX17 \*  
 9692073 2651 1 UTP14A \*  
 9692074 2651 1 CSSM052 \*  
 9692075 2651 1 BP230017B20A7 \*  
 9692076 2651 1 BP230035000C2 \*  
 9692077 2651 1 BP250001B10D6 \*  
 9692078 2651 1 BP250002A10D5 \*  
 9692079 2651 1 BP250007A20A12 \*  
 9692080 2651 1 BP250008A10E9 \*  
 9692081 2651 1 BP250010A20H9 \*  
 9692082 2651 1 BP250015A10A2 \*  
 9692083 2651 1 BP250015B20H7 \*  
 9692084 2651 1 BP250017A10D2 \*  
 9692085 2651 1 BP250023B10E7 \*  
 9692086 2651 1 BP250026A20B4 \*  
 9692087 2651 1 btcn12770 \*  
 9692088 2651 1 Btcn13635 \*  
 9692089 2651 1 btcn16618 \*  
 9692090 2651 1 btcn16640 \*  
 9692091 2651 1 btcn1695 \*  
 9692092 2651 1 btcn17872 \*  
 9692093 2651 1 btcn18594 \*  
 9692094 2651 1 btcn20796 \*  
 9692095 2651 1 btcn2277 \*

9692096 2651 1 btcn2837 \*  
 9692097 2651 1 btcn33592 \*  
 9692098 2651 1 Btcn34811 \*  
 9692099 2651 1 Btcn35892 \*  
 9692100 2651 1 btcn36414 \*  
 9692101 2651 1 btcn38688 \*  
 9692102 2651 1 btcn39170 \*  
 9692103 2651 1 btcn40273 \*  
 9692104 2651 1 btcn41665 \*  
 9692105 2651 1 btcn6627 \*  
 9692106 2651 1 TGLA9 \*  
 9692107 2651 1 btcn44908 \*  
 9692108 2651 1 F10 \*  
 9692109 2651 1 ADA \*  
 9692110 2651 1 B4GALT5 \*  
 9692111 2651 1 BPI \*  
 9692112 2651 1 BS69 \*  
 9692113 2651 1 BZ908049 \*  
 9692114 2651 1 BZ948834 \*  
 9692115 2651 1 C10orf7 \*  
 9692116 2651 1 C20orf104 \*  
 9692117 2651 1 CC470305 \*  
 9692118 2651 1 CC578975 \*  
 9692119 2651 1 CHGB \*  
 9692120 2651 1 CRFG \*  
 9692121 2651 1 CST3 \*  
 9692122 2651 1 DNAJC5 \*  
 9692123 2651 1 GNAS\_(5) \*  
 9692124 2651 1 IDH3B \*  
 9692125 2651 1 IL2RA \*  
 9692126 2651 1 MAPRE1 \*  
 9692127 2651 1 MAVS \*  
 9692128 2651 1 MJ53F20 \*  
 9692129 2651 1 NCOA5 \*  
 9692130 2651 1 NET1 \*  
 9692131 2651 1 OXT \*  
 9692132 2651 1 PLCB4 \*  
 9692133 2651 1 POLR3F \*  
 9692134 2651 1 PROCR \*  
 9692135 2651 1 PTGIS \*  
 9692136 2651 1 S612 \*  
 9692137 2651 1 SNRPB2 \*  
 9692138 2651 1 SVIL \*  
 9692139 2651 1 TDE1 \*  
 9692140 2651 1 TGM2 \*  
 9692141 2651 1 THBD \*  
 9692142 2651 1 YWHAB \*  
 9692143 2651 1 COMMD3 \*  
 9692144 2651 1 PLCG1 \*  
 9692145 2651 1 PRNP \*  
 9692146 2651 1 BM2934 \*  
 9692147 2651 1 BM302 \*  
 9692148 2651 1 BM4305 \*  
 9692149 2651 1 BM4630 \*  
 9692150 2651 1 BM6425 \*  
 9692151 2651 1 BM8215 \*  
 9692152 2651 1 BMC1207 \*  
 9692153 2651 1 BMS108 \*  
 9692154 2651 1 BMS1747 \*  
 9692155 2651 1 BMS2055 \*  
 9692156 2651 1 CSSM066 \*  
 9692157 2651 1 DGAT1 \*  
 9692158 2651 1 DIK\_2439 \*  
 9692159 2651 1 DIK\_4015 \*  
 9692160 2651 1 DIK\_4177 \*  
 9692161 2651 1 DIK\_4182 \*



amaraUIDs.txt

9692162 2651 1 DIK\_4681 \*  
 9692163 2651 1 DIK\_4707 \*  
 9692164 2651 1 DIK\_4774 \*  
 9692165 2651 1 DIK062 \*  
 9692166 2651 1 FBXL6 \*  
 9692167 2651 1 GPAA1 \*  
 9692168 2651 1 HSF \*  
 9692169 2651 1 ILSTS008 \*  
 9692170 2651 1 ILSTS039 \*  
 9692171 2651 1 INRA092 \*  
 9692172 2651 1 MAF \*  
 9692173 2651 1 PAG \*  
 9692174 2651 1 RM011 \*  
 9692175 2651 1 RM137 \*  
 9692176 2651 1 BM4513 \*  
 9692177 2651 1 DIK\_2592 \*  
 9692178 2651 1 BM1508 \*  
 9692179 2651 1 DIK\_1101 \*  
 9692180 2651 1 DIK\_2196 \*  
 9692181 2651 1 DIK\_2201 \*  
 9692182 2651 1 DIK\_2447 \*  
 9692183 2651 1 DIK\_2742 \*  
 9692184 2651 1 ILSTS011 \*  
 9692185 2651 1 APOA1 \*  
 9692186 2651 1 CD44 \*  
 9692187 2651 1 FSHB \*  
 9692188 2651 1 MGC33371 \*  
 9692189 2651 1 MMP1 \*  
 9692190 2651 1 NUMA \*  
 9692191 2651 1 PORIMIN \*  
 9692192 2651 1 PTH \*  
 9692193 2651 1 RRM1 \*  
 9692194 2651 1 HBB \*  
 9692195 2651 1 SDHD \*  
 9692196 2651 1 AL184253\_(MMP11) \*  
 9692197 2651 1 BM1862 \*  
 9692198 2651 1 BM8125 \*  
 9692199 2651 1 BMS1373 \*  
 9692200 2651 1 CSSM033 \*  
 9692201 2651 1 ETH185\_(MB008) \*  
 9692202 2651 1 HUJ223 \*  
 9692203 2651 1 LIF \*  
 9692204 2651 1 TGLA231 \*  
 9692205 2651 1 UCP1 \*  
 9692206 2651 1 URB062 \*  
 9692207 2651 1 BZ917545 \*  
 9692208 2651 1 CC500703 \*  
 9692209 2651 1 IOZARA975 \*  
 9692210 2651 1 OarVH98 \*  
 9692211 2651 1 TLR2 \*  
 9692212 2651 1 18c11 \*  
 9692213 2651 1 18c111 \*  
 9692214 2651 1 18c12 \*  
 9692215 2651 1 ADCK4 \*  
 9692216 2651 1 AMFR \*  
 9692217 2651 1 ANMX \*  
 9692218 2651 1 ATBF1 \*  
 9692219 2651 1 AURKC \*  
 9692220 2651 1 AXL \*  
 9692221 2651 1 BCKDHA \*  
 9692222 2651 1 BM2078 \*  
 9692223 2651 1 BM6507 \*  
 9692224 2651 1 BM7109 \*  
 9692225 2651 1 BMS2785 \*  
 9692226 2651 1 BMS929 \*  
 9692227 2651 1 CA11 \*

amaraUIDs.txt

9692228 2651 1 CALB2 \*  
 9692229 2651 1 CFBF \*  
 9692230 2651 1 CDH5 \*  
 9692231 2651 1 CEBPA \*  
 9692232 2651 1 COX6B \*  
 9692233 2651 1 CYLD \*  
 9692234 2651 1 DMAHP \*  
 9692235 2651 1 DNCLI2 \*  
 9692236 2651 1 ERCC2 \*  
 9692237 2651 1 ETFB \*  
 9692238 2651 1 FANCA \*  
 9692239 2651 1 FCGRT \*  
 9692240 2651 1 FXYD7 \*  
 9692241 2651 1 GALNS \*  
 9692242 2651 1 GMFG \*  
 9692243 2651 1 HAUT14 \*  
 9692244 2651 1 HP \*  
 9692245 2651 1 HSD11B2 \*  
 9692246 2651 1 IDVGA-31 \*  
 9692247 2651 1 IDVGA-55 \*  
 9692248 2651 1 ILSTS21 \*  
 9692249 2651 1 INRA121 \*  
 9692250 2651 1 IRF3 \*  
 9692251 2651 1 KARS \*  
 9692252 2651 1 KIAA0174 \*  
 9692253 2651 1 KLP1 \*  
 9692254 2651 1 LCAT \*  
 9692255 2651 1 MAP4K1 \*  
 9692256 2651 1 MMP2 \*  
 9692257 2651 1 NM\_014062 \*  
 9692258 2651 1 NM\_017803 \*  
 9692259 2651 1 NM\_024860 \*  
 9692260 2651 1 NM\_032268 \*  
 9692261 2651 1 NOD2 \*  
 9692262 2651 1 NQO1 \*  
 9692263 2651 1 NUTF2 \*  
 9692264 2651 1 PEG3 \*  
 9692265 2651 1 PLD3 \*  
 9692266 2651 1 POP4 \*  
 9692267 2651 1 PSMB10 \*  
 9692268 2651 1 PSMC4 \*  
 9692269 2651 1 RPL28 \*  
 9692270 2651 1 RRAD \*  
 9692271 2651 1 SF3B3 \*  
 9692272 2651 1 SIRT2 \*  
 9692273 2651 1 SLC7A5 \*  
 9692274 2651 1 SPG7 \*  
 9692275 2651 1 TGLA227 \*  
 9692276 2651 1 TK2 \*  
 9692277 2651 1 TNNT1 \*  
 9692278 2651 1 UBA2 \*  
 9692279 2651 1 UWCA5 \*  
 9692280 2651 1 VPS4A \*  
 9692281 2651 1 NM\_024519 \*  
 9692282 2651 1 PPP2R1A \*  
 9692283 2651 1 SYMPK \*  
 9692284 2651 1 BM3517 \*  
 9692285 2651 1 BRD9 \*  
 9692286 2651 1 CCT5 \*  
 9692287 2651 1 DKFZP761C169 \*  
 9692288 2651 1 LOC134147 \*  
 9692289 2651 1 MYO10 \*  
 9692290 2651 1 ZNF262 \*  
 9692291 2651 1 PHGDH \*  
 9692292 2651 1 BM3413 \*  
 9692293 2651 1 BMC5221 \*

9692294 2651 1 BMS2382 \*  
 9692295 2651 1 CC350547 \*  
 9692296 2651 1 CHGA \*  
 9692297 2651 1 DIK2116 \*  
 9692298 2651 1 DIK2367 \*  
 9692299 2651 1 DIK2821 \*  
 9692300 2651 1 DIK2849 \*  
 9692301 2651 1 DIK3001 \*  
 9692302 2651 1 DIK3009 \*  
 9692303 2651 1 DIK4322 \*  
 9692304 2651 1 DIK4894 \*  
 9692305 2651 1 ETH131 \*  
 9692306 2651 1 GRP58 \*  
 9692307 2651 1 IGF1R \*  
 9692308 2651 1 ILSTS054 \*  
 9692309 2651 1 ILSTS092 \*  
 9692310 2651 1 MBIP \*  
 9692311 2651 1 MFG8 \*  
 9692312 2651 1 MULGE4 \*  
 9692313 2651 1 SERPINA1 \*  
 9692314 2651 1 DIK2586-ga \*  
 9692315 2651 1 AGLA233 \*  
 9692316 2651 1 AKT1 \*  
 9692317 2651 1 BMS1494 \*  
 9692318 2651 1 BMS1561 \*  
 9692319 2651 1 BMS868 \*  
 9692320 2651 1 DIK3023 \*  
 9692321 2651 1 IDVGA-39 \*  
 9692322 2651 1 RM151 \*  
 9692323 2651 1 BM1558 \*  
 9692324 2651 1 BM2613 \*  
 9692325 2651 1 BMS2573 \*  
 9692326 2651 1 BMS672 \*  
 9692327 2651 1 CSSM006 \*  
 9692328 2651 1 CSSM026 \*  
 9692329 2651 1 INRA194 \*  
 9692330 2651 1 TLR9 \*  
 9692331 2651 1 CSSM041 \*  
 9692332 2651 1 HUJI75 \*  
 9692333 2651 1 ADCYAP1 \*  
 9692334 2651 1 YES1 \*  
 9692335 2651 1 ACADSB \*  
 9692336 2651 1 CSL4 \*  
 9692337 2651 1 CUEDC2 \*  
 9692338 2651 1 ECHS1 \*  
 9692339 2651 1 HIF1AN \*  
 9692340 2651 1 HPS1 \*  
 9692341 2651 1 IDVGA-59 \*  
 9692342 2651 1 SEC23IP \*  
 9692343 2651 1 XPNPEP1 \*  
 9692344 2651 1 ZDHHC6 \*  
 9692345 2651 1 ACTA2 \*  
 9692346 2651 1 MGEA5 \*  
 9692347 2651 1 APOB48R \*  
 9692348 2651 1 AQP8 \*  
 9692349 2651 1 ARPC1A \*  
 9692350 2651 1 BM1864 \*  
 9692351 2651 1 BM4005 \*  
 9692352 2651 1 BM7207 \*  
 9692353 2651 1 BM737 \*  
 9692354 2651 1 BMC4216 \*  
 9692355 2651 1 BMS1353 \*  
 9692356 2651 1 BMS65 \*  
 9692357 2651 1 C160rf72 \*  
 9692358 2651 1 CENTA1 \*  
 9692359 2651 1 CHST12 \*

amaraUIDs.txt

9692360 2651 1 DAGLB \*  
 9692361 2651 1 ELN \*  
 9692362 2651 1 EMP2 \*  
 9692363 2651 1 FAM86A \*  
 9692364 2651 1 FLJ11151 \*  
 9692365 2651 1 FOXK1 \*  
 9692366 2651 1 GAL3ST4 \*  
 9692367 2651 1 GRIN2A \*  
 9692368 2651 1 GTF3C1 \*  
 9692369 2651 1 KIAA030 \*  
 9692370 2651 1 LOC511442 \*  
 9692371 2651 1 LOC616782 \*  
 9692372 2651 1 LOC783396 \*  
 9692373 2651 1 LOC78640 \*  
 9692374 2651 1 MRPS17 \*  
 9692375 2651 1 MYH11 \*  
 9692376 2651 1 NUBP2 \*  
 9692377 2651 1 PHKG2 \*  
 9692378 2651 1 RAB26 \*  
 9692379 2651 1 RBBP6 \*  
 9692380 2651 1 SEC14L5 \*  
 9692381 2651 1 TMEM186 \*  
 9692382 2651 1 UMOD \*  
 9692383 2651 1 USP42 \*  
 9692384 2651 1 RUND2CA \*  
 9692385 2651 1 AF4 \*  
 9692386 2651 1 AF5 \*  
 9692387 2651 1 BMS2843 \*  
 9692388 2651 1 RABL5 \*  
 9692389 2651 1 URB036 \*  
 9692390 2651 1 TLR3 \*  
 9692391 2651 1 D1S4\_(MAF46) \*  
 9692392 2651 1 ILSTS030 \*  
 9692393 2651 1 BE217497 \*  
 9692394 2651 1 BM6000 \*  
 9692395 2651 1 BMC5012 \*  
 9692396 2651 1 BMS1920 \*  
 9692397 2651 1 BMS2503 \*  
 9692398 2651 1 BMS501 \*  
 9692399 2651 1 CLTC \*  
 9692400 2651 1 ETH12 \*  
 9692401 2651 1 FCB193 \*  
 9692402 2651 1 GAS7 \*  
 9692403 2651 1 IDVGA-47 \*  
 9692404 2651 1 ILSTS014 \*  
 9692405 2651 1 LOC90799 \*  
 9692406 2651 1 MB066 \*  
 9692407 2651 1 MGC20398 \*  
 9692408 2651 1 PECAM1 \*  
 9692409 2651 1 PSMC5 \*  
 9692410 2651 1 ARRB2 \*  
 9692411 2651 1 BM9202 \*  
 9692412 2651 1 BMS1069 \*  
 9692413 2651 1 NSD1 \*  
 9692414 2651 1 TAU \*  
 9692415 2651 1 TBCD \*  
 9692416 2651 1 AKNA \*  
 9692417 2651 1 BM310 \*  
 9692418 2651 1 BM8129 \*  
 9692419 2651 1 BMS1591 \*  
 9692420 2651 1 BMS2629 \*  
 9692421 2651 1 BMS836 \*  
 9692422 2651 1 BP2 \*  
 9692423 2651 1 CLU \*  
 9692424 2651 1 FLJ10853 \*  
 9692425 2651 1 FLJ31810 \*

9692426 2651 1 IDVGA-52 \*  
 9692427 2651 1 MB065 \*  
 9692428 2651 1 MSRA \*  
 9692429 2651 1 NDUFB6 \*  
 9692430 2651 1 ORM1 \*  
 9692431 2651 1 PNOG \*  
 9692432 2651 1 PTP9Q22 \*  
 9692433 2651 1 RM321 \*  
 9692434 2651 1 SPIN \*  
 9692435 2651 1 SRC259 \*  
 9692436 2651 1 SRC276 \*  
 9692437 2651 1 TLR4 \*  
 9692438 2651 1 URB037 \*  
 9692439 2651 1 URF2 \*  
 9692440 2651 1 ZNF189 \*  
 9692441 2651 1 BMS2196 \*  
 9692442 2651 1 BM3419 \*  
 9692443 2651 1 BMS2847 \*  
 9692444 2651 1 BMS678 \*  
 9692445 2651 1 CSSM037 \*  
 9692446 2651 1 CSSM047 \*  
 9692447 2651 1 NUDT2 \*  
 9692448 2651 1 RIG-I \*  
 9692449 2651 1 RM372 \*  
 9692450 2651 1 ROR2 \*  
 9692451 2651 1 SEMA4D \*  
 9692452 2651 1 CGN1 \*  
 9692453 2651 1 BM6121 \*  
 9692454 2651 1 TGLA53 \*  
 9692455 2651 1 TLR5 \*  
 9692456 2651 1 DUSP4 \*  
 9692457 2651 1 KIF13B \*  
 9692458 2651 1 MRPL \*  
 9692459 2651 1 SOX7 \*  
 9692460 2651 1 ATRX \*  
 9692461 2651 1 BL22 \*  
 9692462 2651 1 BM6017 \*  
 9692463 2651 1 BM9208 \*  
 9692464 2651 1 BMS1820 \*  
 9692465 2651 1 BMS2152 \*  
 9692466 2651 1 BMS2227 \*  
 9692467 2651 1 BMS397 \*  
 9692468 2651 1 BMS417 \*  
 9692469 2651 1 BMS903 \*  
 9692470 2651 1 BMS938 \*  
 9692471 2651 1 CNK2 \*  
 9692472 2651 1 DKC1 \*  
 9692473 2651 1 ELF4 \*  
 9692474 2651 1 FCL4\_(3) \*  
 9692475 2651 1 GABRE \*  
 9692476 2651 1 HADH2 \*  
 9692477 2651 1 HUMM2-21 \*  
 9692478 2651 1 ILSTS017 \*  
 9692479 2651 1 INRA120 \*  
 9692480 2651 1 MAOA \*  
 9692481 2651 1 MCM74 \*  
 9692482 2651 1 PLP1\_(PLP3) \*  
 9692483 2651 1 PLS3 \*  
 9692484 2651 1 PPEF1 \*  
 9692485 2651 1 PRPS2 \*  
 9692486 2651 1 RM350 \*  
 9692487 2651 1 SLC6A8 \*  
 9692488 2651 1 TGLA325 \*  
 9692489 2651 1 THOC2\_(5) \*  
 9692490 2651 1 TLR7 \*  
 9692491 2651 1 TLR8 \*

amaralUIDs.txt

|         |      |                |   |
|---------|------|----------------|---|
| 9692492 | 2651 | 1 TNFSF5       | * |
| 9692493 | 2651 | 1 UREB1        | * |
| 9692494 | 2651 | 1 XBM361       | * |
| 9692495 | 2651 | 1 XBM38        | * |
| 9692496 | 2651 | 1 XBM73        | * |
| 9692497 | 2651 | 1 AMELX        | * |
| 9692498 | 2651 | 1 ASMTL        | * |
| 9692499 | 2651 | 1 BDA20        | * |
| 9692500 | 2651 | 1 BL1098       | * |
| 9692501 | 2651 | 1 BMS500       | * |
| 9692502 | 2651 | 1 INRA30       | * |
| 9692503 | 2651 | 1 MAF45        | * |
| 9692504 | 2651 | 1 XBM11        | * |
| 9692505 | 2651 | 1 XBM24        | * |
| 9692506 | 2651 | 1 XBM411       | * |
| 9692507 | 2651 | 1 XBM7         | * |
| 9692508 | 2651 | 1 XIST         | * |
| 9692509 | 2651 | 1 PBBRR1-0907r | * |
| 9692510 | 2651 | 1 TSPY         | * |
| 9692511 | 2651 | 1 UMN0304      | * |
| 9692512 | 2651 | 1 UMN0929      | * |
| 9692513 | 2651 | 1 UMN2008      | * |
| 9692514 | 2651 | 1 Yp11_Rep     | * |
| 9692515 | 2651 | 1 AMELY        | * |
| 9692516 | 2651 | 1 BRY.1        | * |
| 9692517 | 2651 | 1 EIF1AY       | * |
| 9692518 | 2651 | 1 INRA189      | * |
| 9692519 | 2651 | 1 UMN0803      | * |
| 9692520 | 2651 | 1 UMN2908      | * |
